# Supplementary material
Source: PubMed Central journal article supplement (PMC3307329)
Supplement: supp_M111.308940_jbc.M111.308940-1.pdf [file supp_M111.308940_jbc.M111.308940-1.pdf]

## SUPPLEMENTAL FIGURE LEGENDS

Figure S1: **Effect of Snail and Slug on pericellular proteolytic activity.** AsPC1-vector, AsPC1-Snail and AsPC1-Slug cells were induced with doxycycline (2  $\mu\text{g}/\text{mL}$ ) for 24 hours. The cells were then plated onto glass bottom tissue culture dishes coated with Matrigel containing 25  $\mu\text{g}/\text{mL}$  of DQ-Collagen I. The cells were then imaged 24 hours later by confocal microscopy.

Figure S2: **Effect of Snail and Slug on ERK1/2, Rac1, ROCK1 and ROCK2.** AsPC1-vector, AsPC1-Snail and AsPC1-Slug cells were induced with doxycycline (2  $\mu\text{g}/\text{mL}$ ) for 24 hours. The lysates were analyzed for total ERK1/2 (*A*), Rac1 (*B*), ROCK1/2 (*C*) using tubulin as loading control.

Figure S3: **ERK1/2 mediates collagen I-driven motility of Snail-expressing cells.** AsPC1 cells were induced with doxycycline (2  $\mu\text{g}/\text{mL}$ ) for 24 hours and plated onto thin-layer type I collagen matrix overlaid with colloidal gold in the presence of either DMSO or U0126 (10  $\mu\text{M}$ ). The cells were allowed to migrate for 24 hours and the tracks photographed (*A*) and quantified (*B*).

Figure S4: **Effect of Snail and Slug on integrin expression in Panc1 cells.** Panc1-Vector, Panc1-Snail and Panc1-Slug cells were induced with doxycycline for 24 hours. The cells were then analyzed for  $\alpha 2$ -,  $\alpha 3$ -,  $\beta 1$ -integrin expression by FACS analysis.

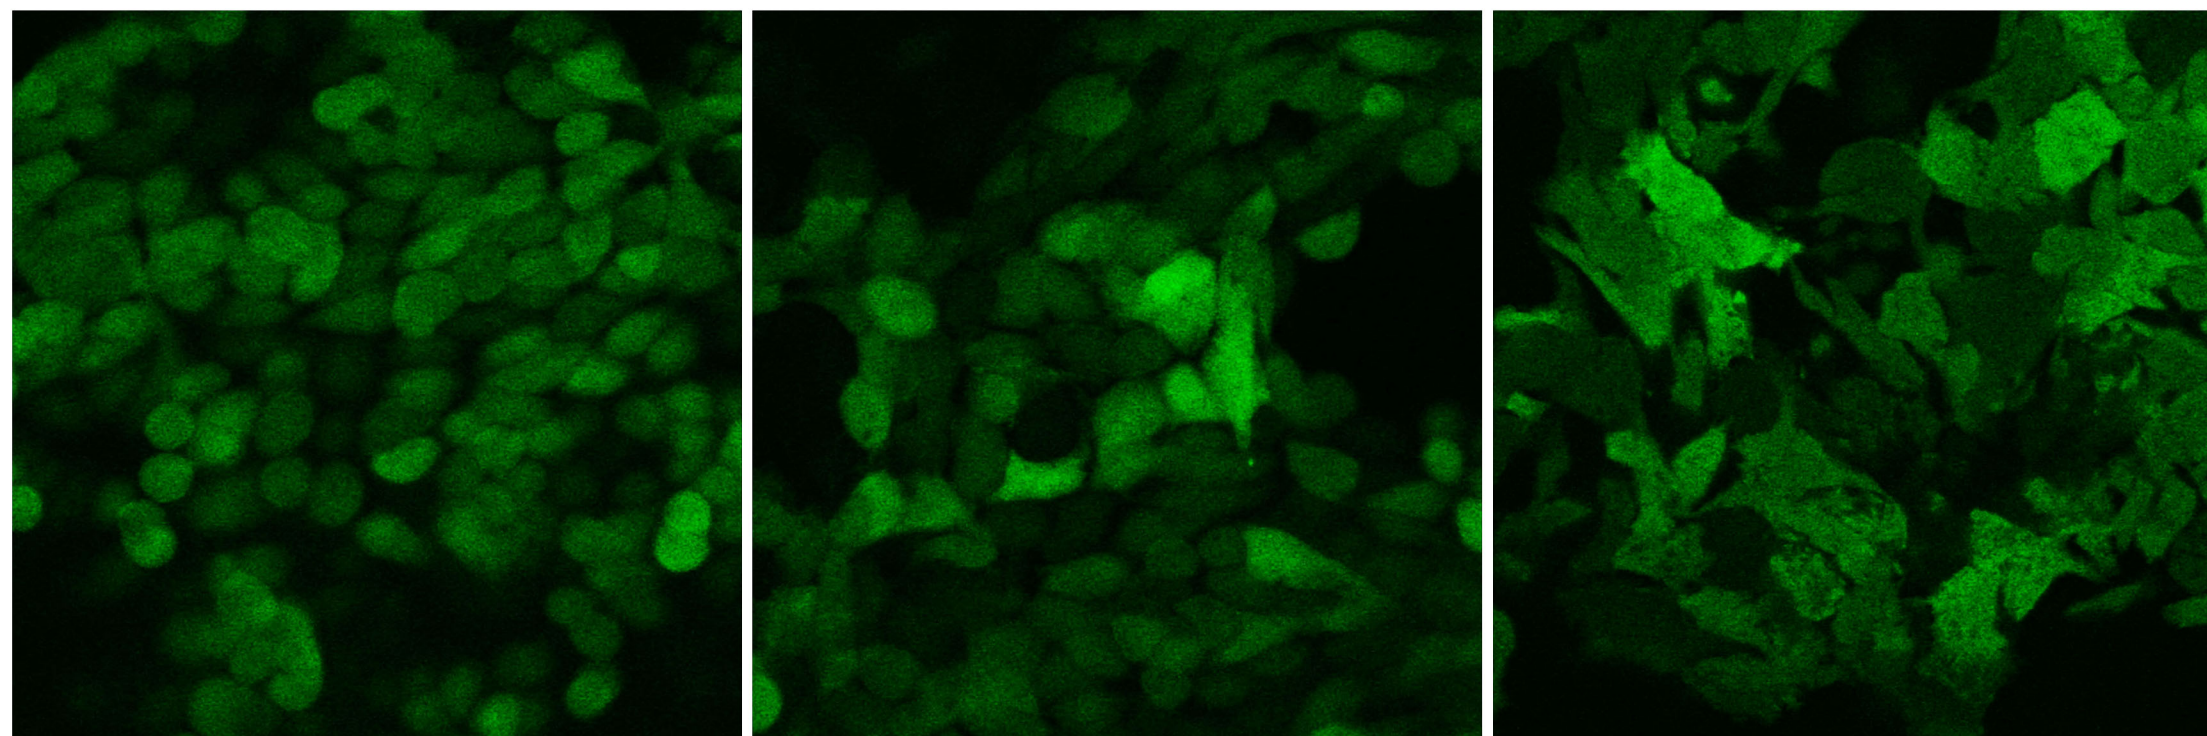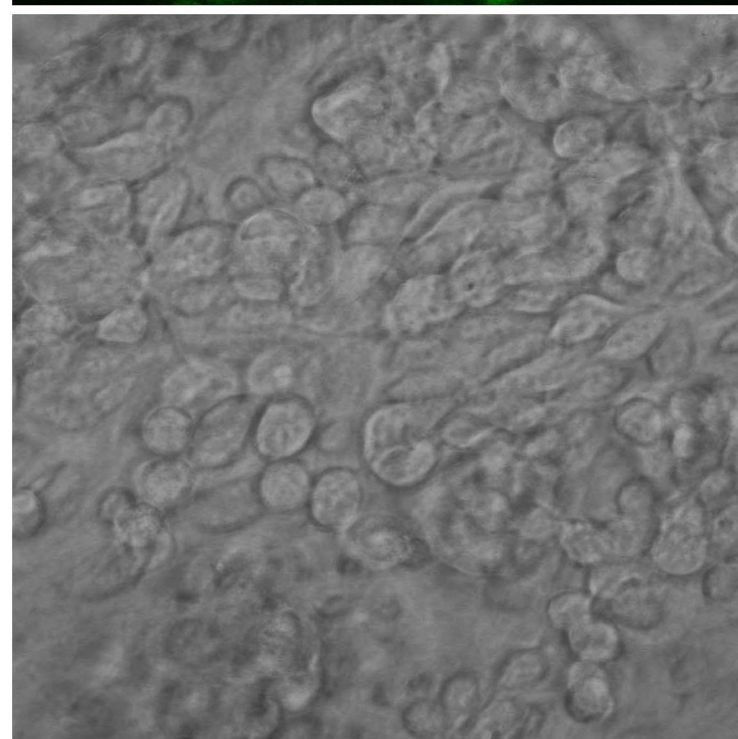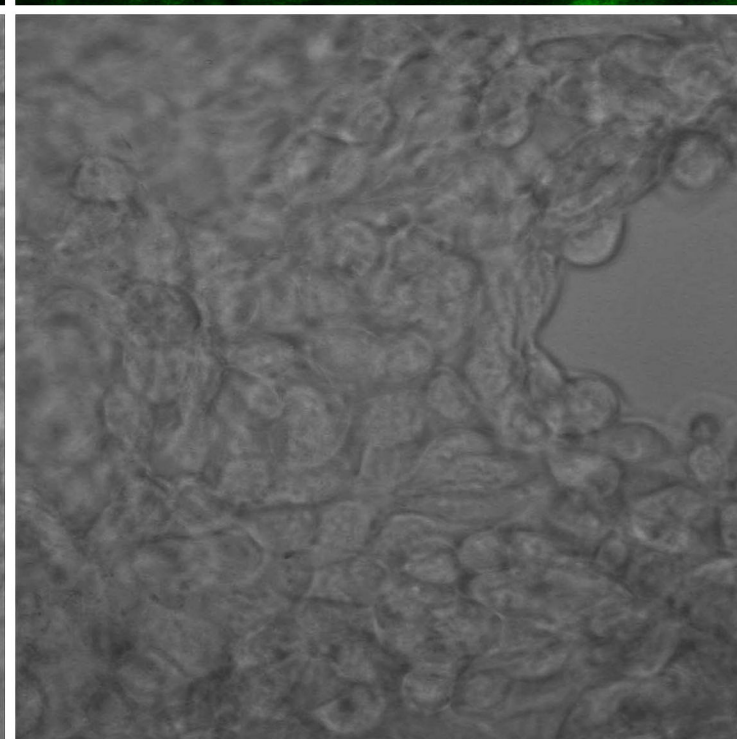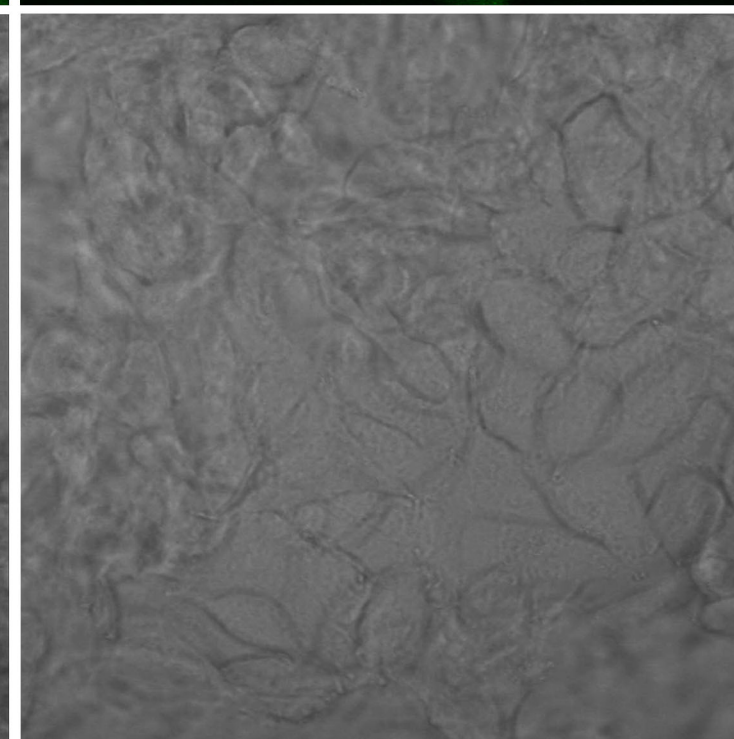

**Vector**

**Snail  
AsPC1**

**Slug**



A

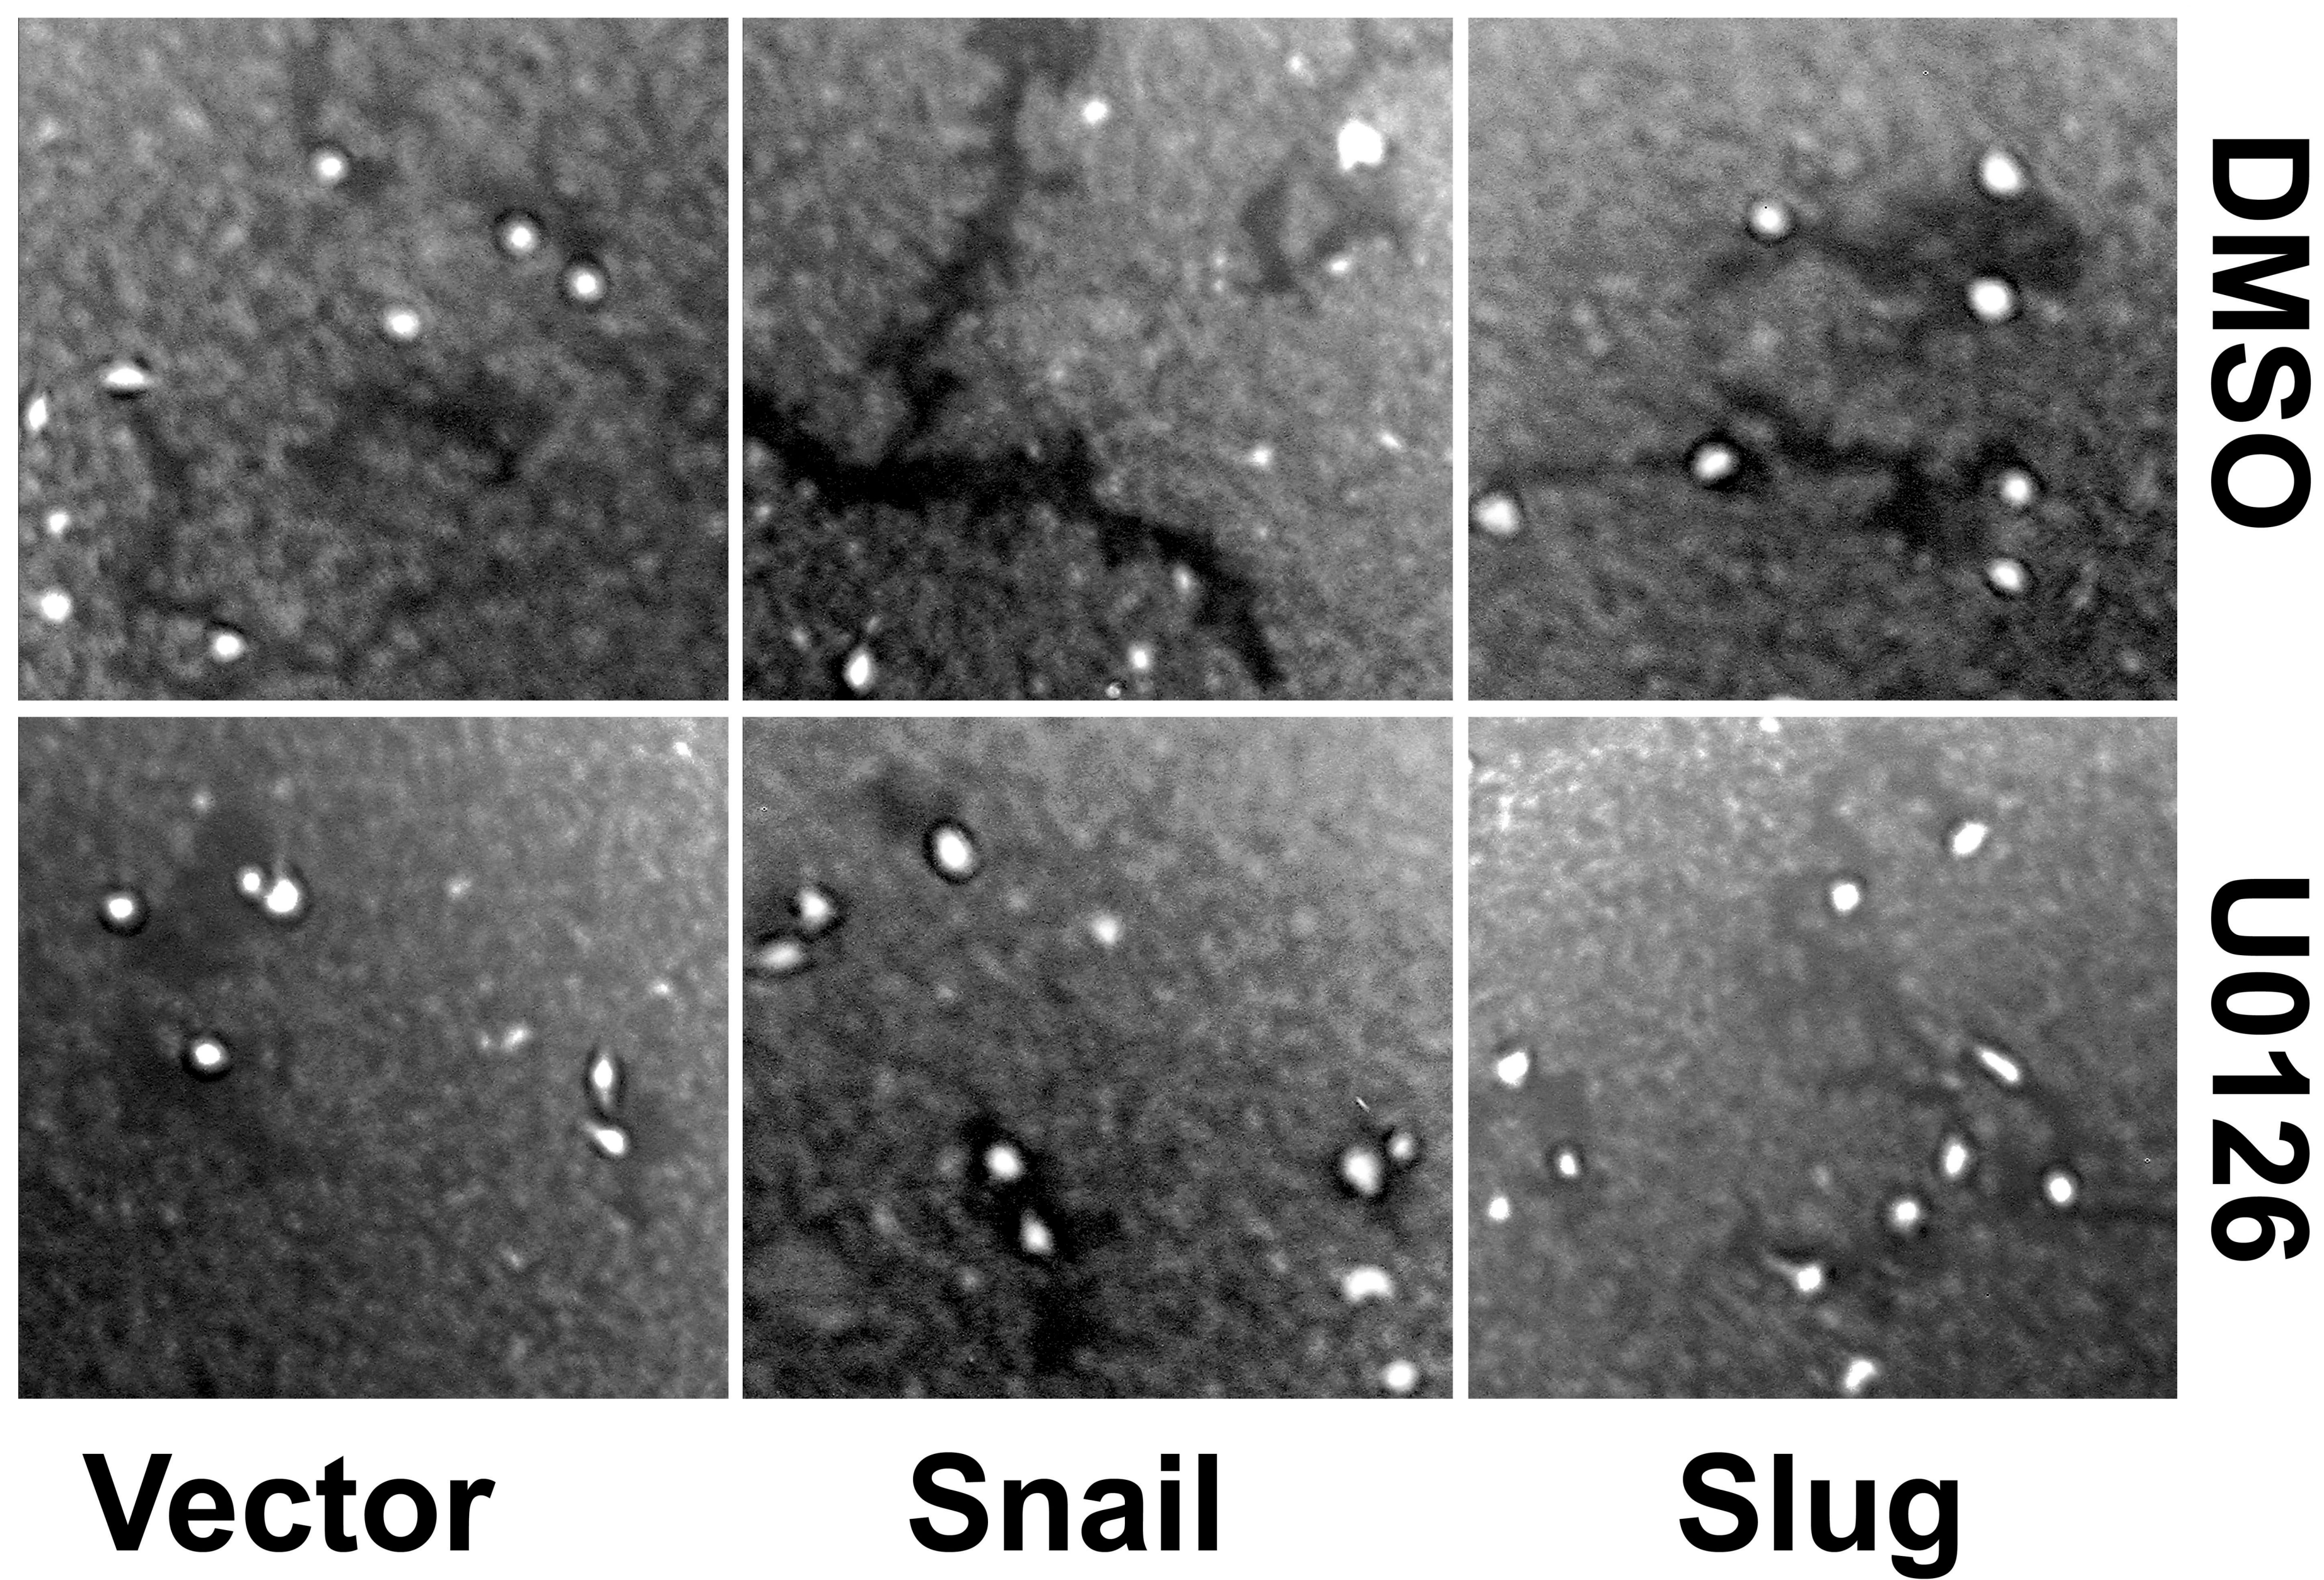

B

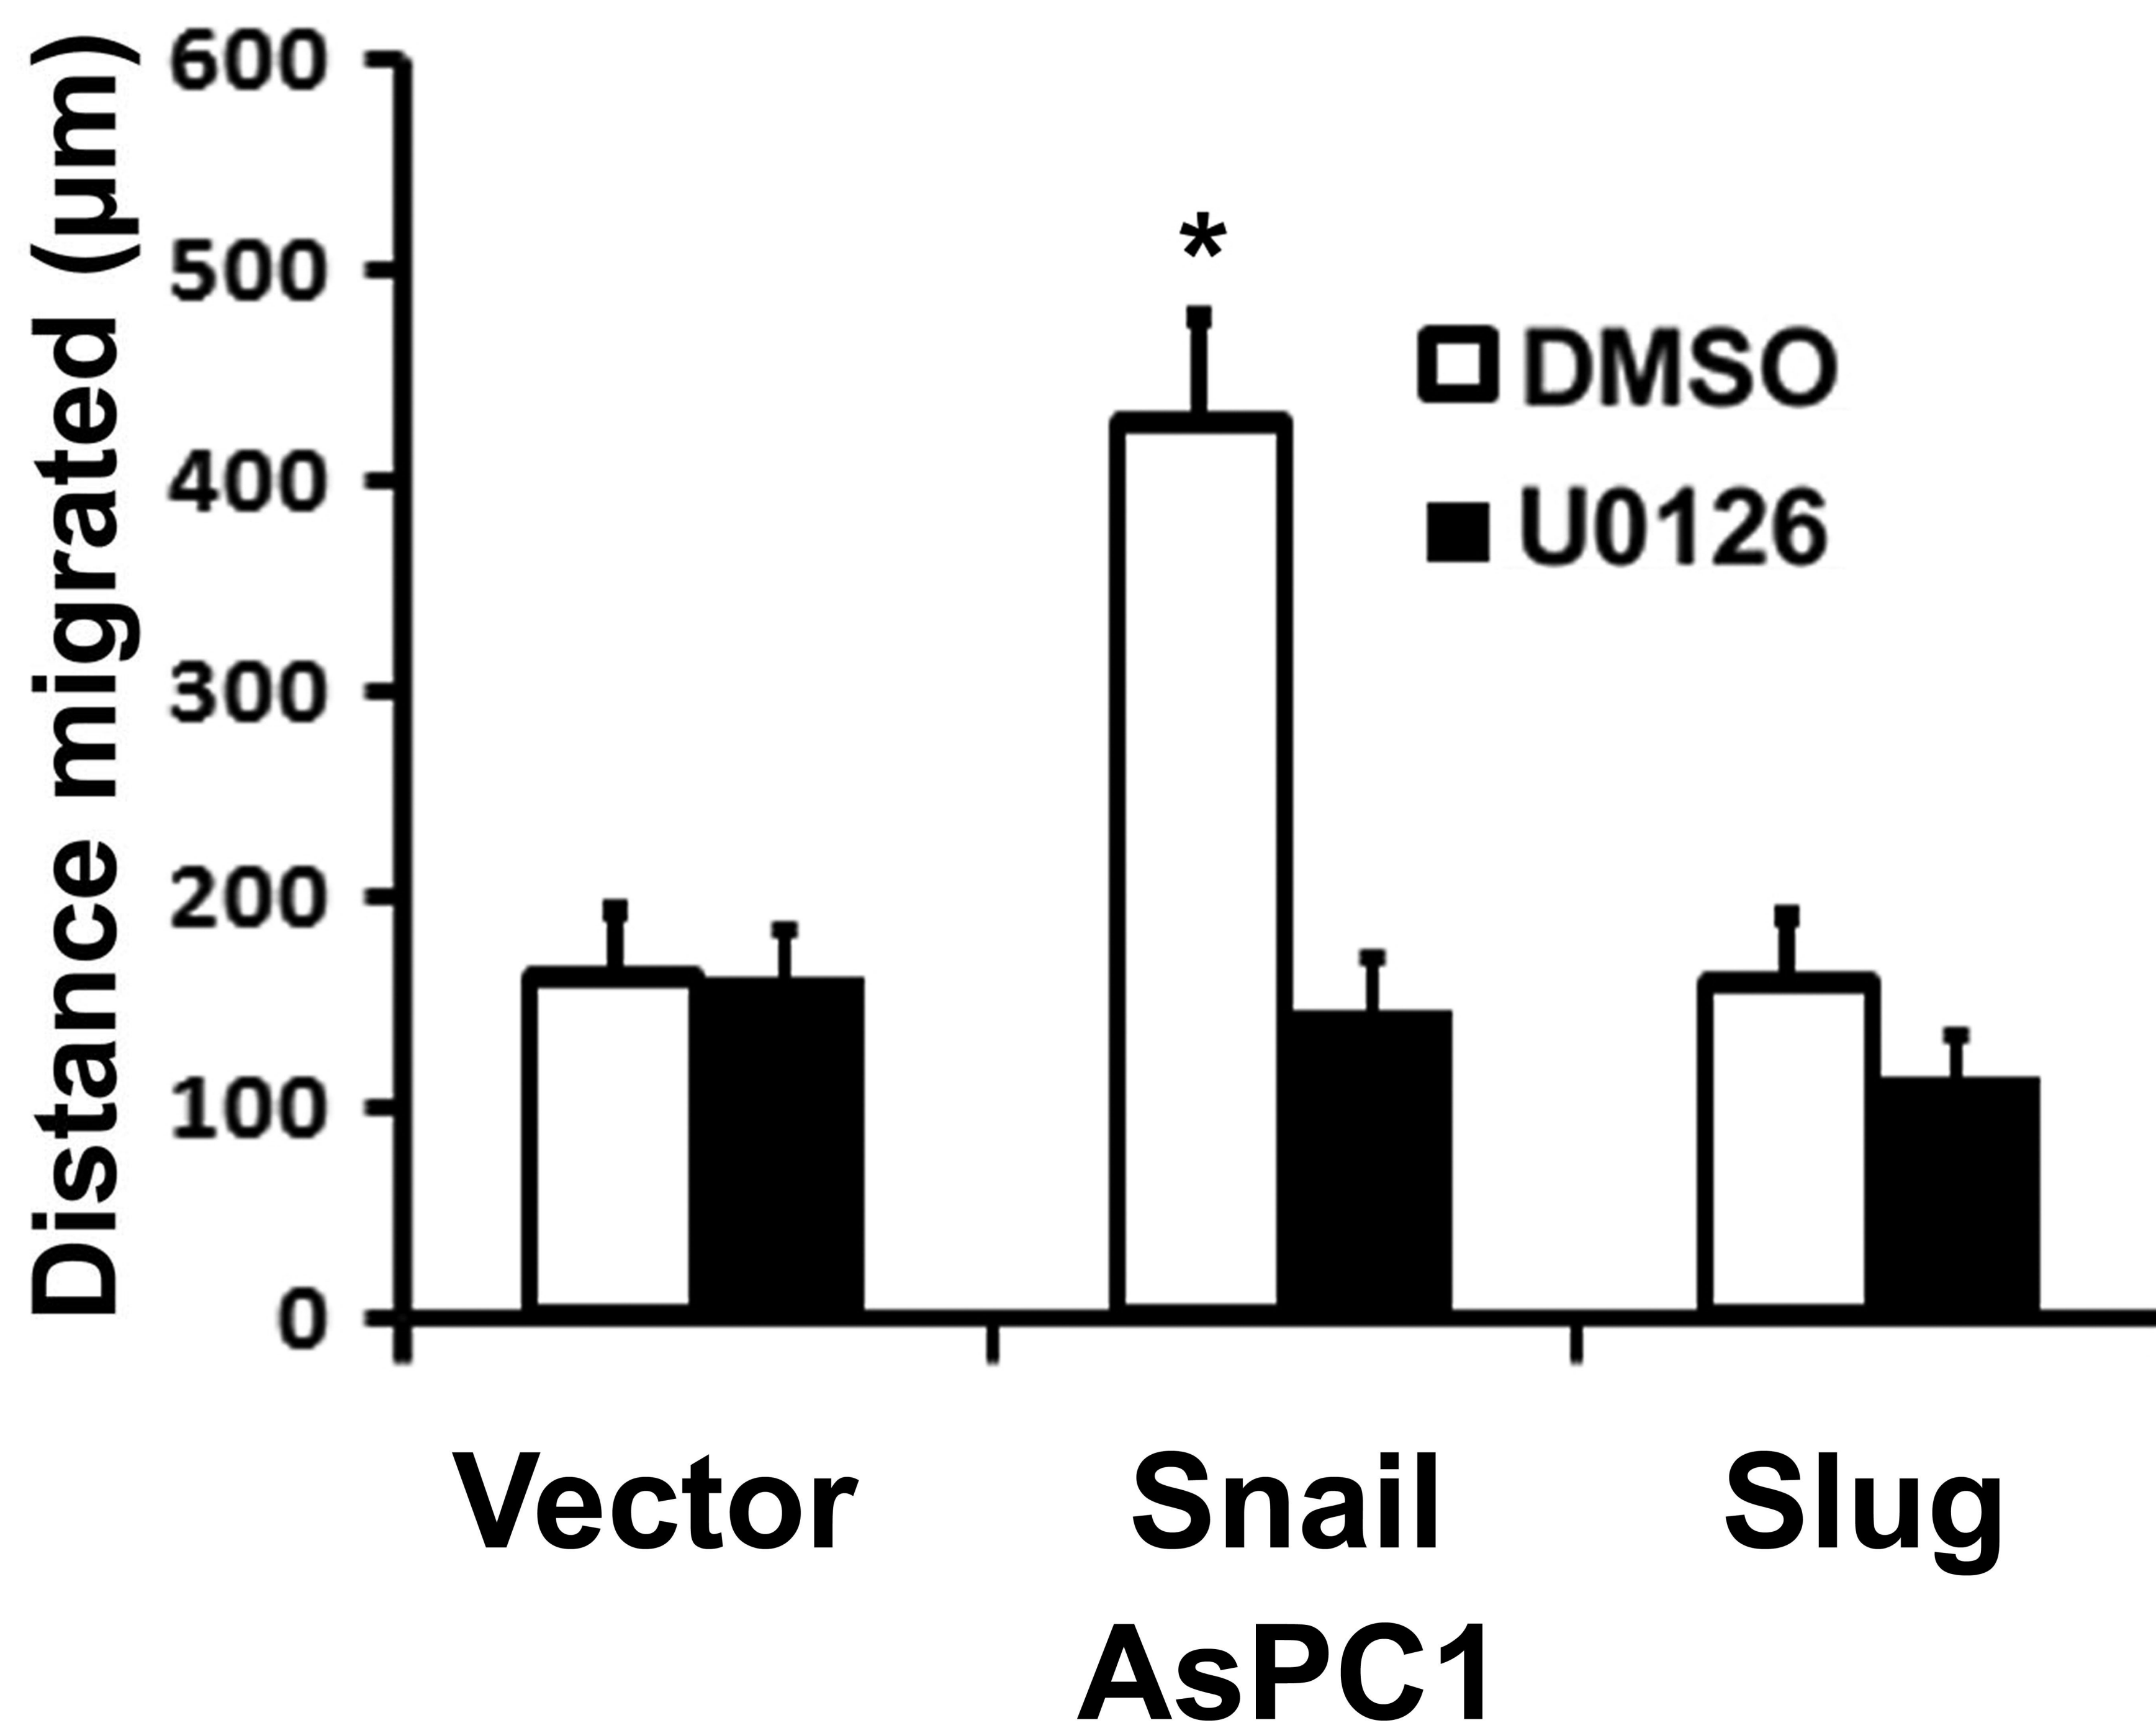

A

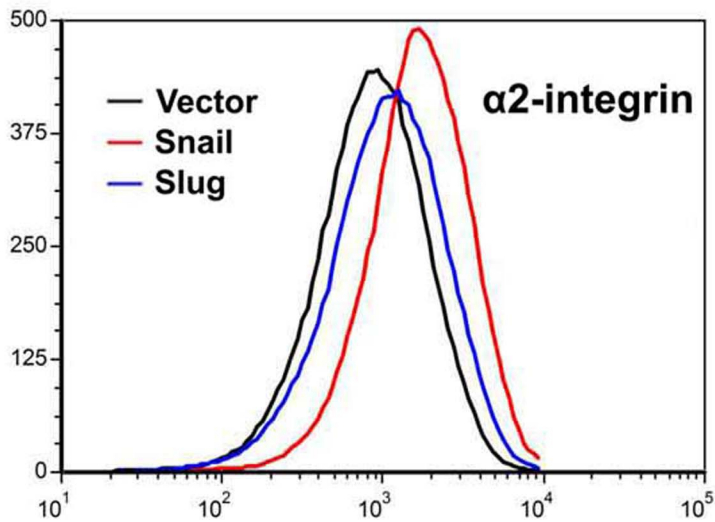

B

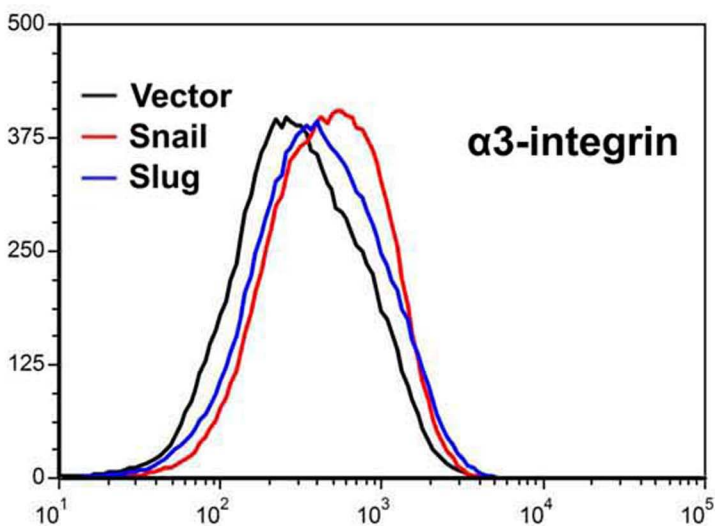

C

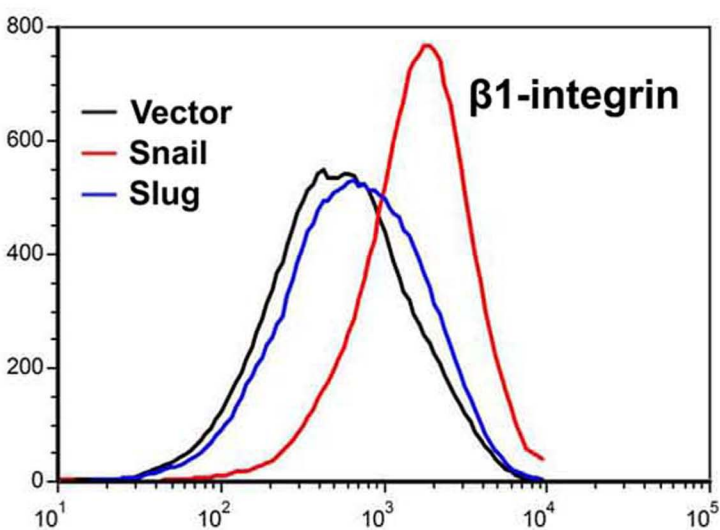

Panc1
